# Supplementary material
Source: publisher figshare collection journal article supplement (https://frontiersin.figshare.com/ndownloader/files/23769776)
Supplement: Supplementary file 1 [file 23769776]

**Supplementary material**

**Assessing the dynamics of dissolved organic matter (DOM) in the coastal environments dominated by mangroves, Indian Sundarbans**

Prasun Sanyal1, Raghab Ray2*, Madhusudan Paul1, Vandana Kumari Gupta1, Avanti Acharya1, Sneha Bakshi1, Tapan Kumar Jana1 and Sandip Kumar Mukhopadhyay1*

1. Department of Marine Science, University of Calcutta, 35 B. C. Road, Kolkata-700019, India

2. Department of Chemical Oceanography, Atmosphere and Ocean Research Institute, The University of Tokyo, Kashiwa 277-8564, Japan

*Corresponding authors: [raghab.ray@aori.u-tokyo.ac.jp](mailto:raghab.ray@aori.u-tokyo.ac.jp) (RR), [skm.caluniv@gmail.com](mailto:skm.caluniv@gmail.com) (SKM)


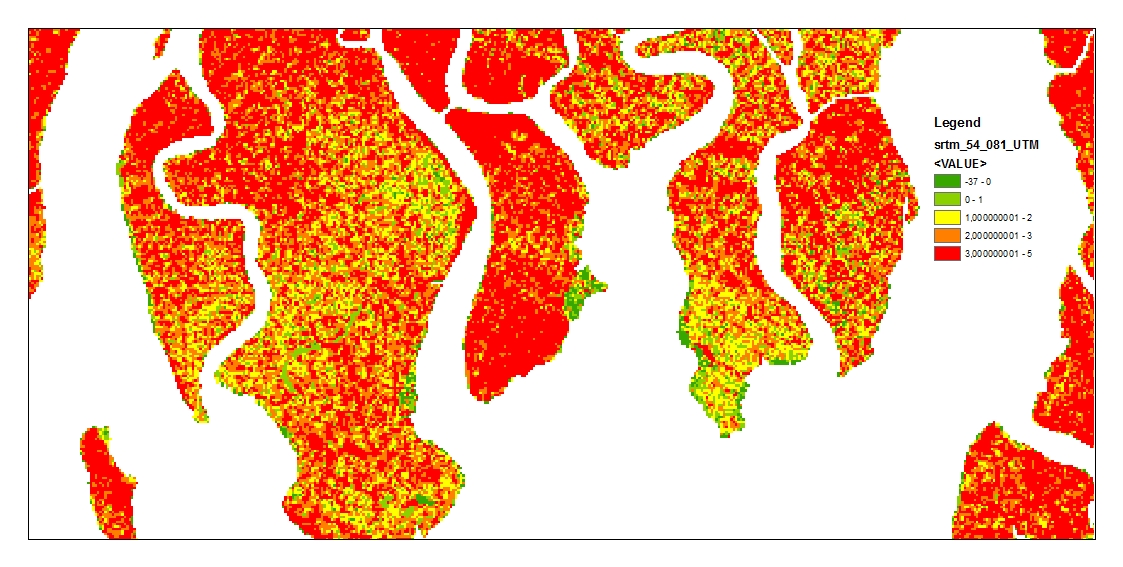


Fig. S1. Digital elevation image retrieved from SRTM digital elevation model showing elevation data of the coastal region of north east Bay of Bengal, covering catchments of the Hooghly and Sundarbans estuaries (image processed in 2015).

Fig S2. Relationship between rainfall (mm) and observed river discharge (m3 s-1). The linear equation was used to calculate predicted river discharge for the period 2016-17.

Fig S3. Relationship between DOC concentration (µM) and acdom(350) m-1 for four estuaries (Hooghly, Saptamukhi, Thakuran and Matla)

Supplementary table S1: Details of sampling locations and physiochemical parameters during 2012-2017

| Sample ID | Station Name | Sampling period  ddmmyy | Tw  (°C) | Salinity | DO  (mg/L) | SPM  (mg/L) | Chl a  (µg/L) | DOC  (mg/L) | CDOM (a350, m-1) | δ13DOC  ‰ |
| --- | --- | --- | --- | --- | --- | --- | --- | --- | --- | --- |
| SBN ST 1 | Saptamukhi upper 1 | 09/06/2017 | 32.5 | 24.23 | 5.41 | 197.74 | 4.13 | - | 3.08 | - |
| SBN ST 6 | Saptamukhi upper 2 | 09/06/2017 | 32.5 | 28.27 | 5.96 | 190.56 | 3.66 | - | 2.72 | - |
| SBN ST 5 | Saptamukhi upper 3 | 09/06/2017 | 32.5 | 28.94 | 6.07 | 147.00 | 2.99 | - | 3.16 | - |
| SBN ST 7 | Saptamukhi upper 4 | 09/06/2017 | 32.5 | 28.27 | 6.47 | 55.83 | 2.10 | - | 3.21 | - |
| SBN ST 14 | Saptamukhi upper 5 | 09/06/2017 | 32.5 | 29.62 | 6.22 | 45.23 | 2.35 | - | - | - |
| SBN ST 2 | Saptamukhi middle 1 | 09/06/2017 | 32.5 | 24.23 | 5.93 | 115.09 | 3.68 | - | 4.02 | - |
| SBN ST 3 | Saptamukhi middle 2 | 10/06/2017 | 33.5 | 24.23 | 6.34 | 60.65 | 8.17 | - | 5.88 | - |
| SBN ST 4 | Saptamukhi lower 1 | 10/06/2017 | 33.0 | 28.94 | 6.16 | 135.00 | 6.65 | - | 4.82 | - |
| SBN ST 8 | Thakuran upper 1 | 10/06/2017 | 34.0 | 28.94 | 6.12 | 87.80 | 2.07 | - | 4.52 | - |
| SBN ST 9 | Thakuran upper 2 | 11/06/2017 | 33.0 | 28.94 | 5.93 | 151.60 | 2.89 | - | - | - |
| SBN ST 12 | Thakuran upper 3 | 11/06/2017 | 32.5 | 30.29 | 6.79 | 128.68 | 3.04 | - | 3.30 | - |
| SBN ST 13 | Dhanchi | 10/06/2017 | 32.0 | 30.29 | 5.92 | 94.80 | 3.29 | - | - | - |
| SBN ST 11 | Thakuran middle | 11/06/2017 | 32.5 | 30.29 | 5.93 |  | 3.39 | - | 3.34 | - |
| SBN ST 10 | Thakuran lower | 11/06/2017 | 32.5 | 30.96 | 5.75 | 170.20 | 3.49 | - | 3.68 | - |
| SBN ST 5 | Thakuran upper 1 | 27/05/2017 | 31.6 | 29.63 | 5.59 | 733.60 | - | 6.19 | 3.76 | - |
| SBN ST 6 | Thakuran upper 2 | 27/05/2017 | 34.0 | 30.30 | 5.52 | 336.50 | 3.11 | 3.73 | 3.45 | - |
| SBN ST 7 | Thakuran middle | 27/05/2017 | 32.5 | 31.65 | 5.56 | 310.75 | 3.11 | 2.42 | 2.52 | - |
| SBN ST 8 | Thakuran lower | 27/05/2017 | 33.5 | 31.65 | 5.61 | 509.75 | 3.85 | 2.11 | 3.32 | - |
| SBN ST 1 | Matla upper 1 | 27/05/2017 | 31.6 | 30.30 | 6.12 | 396.00 | 5.26 | 2.76 | 4.58 | - |
| SBN ST 2 | Matla upper 2 | 27/05/2017 | 32.5 | 30.30 | 6.03 | 170.50 | 3.02 | 2.28 | 3.19 | - |
| SBN ST 3 | Matla upper 3 | 27/05/2017 | 32.3 | 29.63 | 6.08 | 109.00 | 2.55 | 2.27 | 4.18 | -- |
| SBN ST 4 | Matla upper 4 | 28/05/2017 | 34.0 | 29.63 | 6.03 | 154.00 | 4.14 | 1.92 | - | - |
| SBN ST 15 | Matla upper 5 | 28/05/2017 | 33.4 | 28.96 | 6.57 | 304.75 | 2.71 | 2.13 | - | - |
| SBN ST 16 | Matla upper 6 | 28/05/2017 | 34.0 | 30.30 | 6.33 | 386.75 | 3.45 | 1.99 | - | - |
| SBN ST 14 | Matla middle 1 | 28/05/2017 | 33.0 | 29.63 | 6.27 | 343.20 | 2.32 | 2.41 | 3.06 | - |
| SBN ST 13 | Matla middle 2 | 28/05/2017 | 33.0 | 30.30 | 6.18 | 134.50 | 2.14 | 2.31 | 2.96 | - |
| SBN ST 12 | Matla middle 3 | 29/05/2017 | 33.7 | 30.98 | 5.46 | 212.50 | 3.11 | 2.24 | 2.79 | - |
| SBN ST 11 | Matla Lower 1 | 29/05/2017 | 33.5 | 29.63 | 5.39 | 164.00 | 4.58 | 2.41 | 2.85 | - |
| SBN ST 9 | Matla Lower 2 | 29/05/2017 | 34.0 | 30.98 | 5.70 | 260.75 | 3.11 | 2.10 | 3.75 | - |
| SBN ST 10 | Matla Lower 3 | 29/05/2017 | 34.0 | 29.63 | 5.53 | 248.50 | 3.84 | 2.74 | 3.97 | - |
| HGL U 1 | Budge budge | 23/10/2016 | - | 0.08 | 6.45 | 289.20 | 7.67 | 2.82 | 5.08 | - |
| HGL U 2 | Burul | 23/10/2016 | - | 0.13 | 5.24 | 175.33 | 6.72 | 2.91 | 5.80 | - |
| HGL U 3 | Falta | 23/10/2016 | - | 0.19 | 5.38 | 66.83 | 5.49 | 4.08 | 7.58 | - |
| HGL U 4 | Diamond Harbour | 23/10/2016 | 30.5 | 0.32 | 5.66 | 106.50 | 1.92 | 3.70 | 5.93 | - |
| HGL M 1 | Lot 8 | 23/10/2016 | 31.5 | 5.83 | 6.71 | 180.67 | - | 7.95 | 4.91 | - |
| HGL M 2 | Kachuberia | 24/10/2016 | - | 5.19 | 7.14 | 112.79 | - | 4.25 | 4.77 | - |
| HGL M 3 | Krishnanagar | 24/10/2016 | 31.5 | 5.83 | 7.40 | 37.80 | - | 3.12 | - | - |
| HGL L 1 | Beguakhali | 24/10/2016 | 31 | 10.37 | 7.00 | 138.00 | - | 4.72 | 4.61 | - |
| HGL L 2 | Muriganga | 24/10/2016 | 31.5 | 9.08 | 6.62 | 167.33 | 4.52 | 3.98 | 4.66 | - |
| HGL L 3 | Muriganga | 25/10/2016 | **-** | 9.72 | 6.17 | 107.00 | 1.59 | 2.99 | - | - |
| HGL L 4 | Chemaguri | 25/10/2016 | - | 8.43 | 6.37 | 63.90 | 1.83 | 4.29 | 5.16 | - |
| SBN ST 1 | Saptamukhi upper 1 | 13/11/2016 | 28.5 | 15.45 | 6.65 | 280 | 3.63 | 3.34 | 2.6 | - |
| SBN ST 2 | Pathar Pratima | 13/11/2016 | 29 | 15.08 | 6.46 | 90.25 | 2.24 | 3.78 | - | - |
| SBN ST 3 | Ramganga | 13/11/2016 | 28.5 | 14.75 | 6.84 | 122.6 | 1.77 | 2.58 | - | - |
| SBN ST 4 | Saptamukhi middle | 13/11/2016 | 28 | 15.73 | 6.65 | 129.56 | 2.18 | 3.2 | 2.65 | - |
| SBN ST 5 | Saptamukhi lower | 13/11/2016 | 28 | 16.06 | 6.61 | 117.13 | 2.68 | 2.36 | 2.81 | - |
| SBN ST 6 | Thakuran upper | 14/11/2016 | 29 | 14.75 | 6.56 | 79.63 | 2.24 | 3.11 | 2.81 | - |
| SBN ST 7 | Thakuran middle | 14/11/2016 | 29 | 15.4 | 6.74 | 135 | 2.58 | 2.19 | 2.63 | - |
| SBN ST 8 | Thakuran lower | 14/11/2016 | 28.5 | 15.4 | 6.46 | 213.14 | 2.65 | 1.85 | 2.49 | - |
| SBN ST 9 | Matla upper | 14/11/2016 | 28 | 14.42 | 7 | 391.2 | 2.21 | 3.38 | 2.48 | - |
| SBN ST 10 | Matla middle | 15/11/2016 | 28 | 15.08 | 6.91 | 740.8 | 2.24 | 2.62 | 2.5 | - |
| SBN ST 11 | Matla lower | 15/11/2016 | 28 | 15.08 | 7.46 | 350.5 | 3.12 | 2.67 | 2.99 | - |
| SBN ST 12 | Pathar pratima | 31/03/2016 | 31 | 27.55 | 5.78 | 54.91 | 5.01 | 4.51 | - | - |
| SBN ST 13 | Saptamukhi upper | 31/03/2016 | 30.5 | 25.93 | 5.62 | 56.70 | 4.88 | 5.65 | - | - |
| SBN ST 14 | Saptamukhi middle surface | 31/03/2016 | 30 | 25.6 | 6.72 | 59.07 | 4.13 | 4.30 | - | - |
| SBN ST 15 | Saptamukhi middle bottom | 31/03/2016 | - | 25.93 | - | 64.38 | - | 4.64 | - | - |
| SBN ST 16 | Saptamukhi lower surface | 31/03/2016 | 30 | 29.17 | 6.66 | 44.57 | 4.72 | 4.31 | - | - |
| SBN ST 17 | Saptamukhi lower bottom | 31/03/2016 | - | 27.87 | - | 59.41 | - | 4.45 | - | - |
| SBN ST 11 | Thakuran upper | 30/03/2016 | 31 | 28.52 | 6.09 | 63.73 | 3.21 | 4.96 | - | - |
| SBN ST 10 | Thakuran middle | 30/03/2016 | 30.5 | 29.82 | 6.23 | 64.57 | - | 5.1 | - | - |
| SBN ST 9 | Thakuran lower | 30/03/2016 | 31 | 29.82 | 5.78 | 56.8 | 3.05 | 5.24 | - | - |
| SBN ST 1 | Matla upper 1 Jharkhali | 29/03/2016 | 30.5 | 27.22 | 7.21 | 51.44 | - | 5.29 | - | - |
| SBN ST 2 | Matla upper 2 | 29/03/2016 | - | - | - | - | - | - | - | - |
| SBN ST 3 | Matla upper 3 | 29/03/2016 | 30.5 | 27.87 | 6.34 | 75.42 | - | 5.12 | - | - |
| SBN ST 4 | Matla upper 4 | 29/03/2016 | 30.5 | 27.55 | 6.25 | 101.94 | - | 5.03 | - | - |
| SBN ST 5 | Matla middle 1 | 29/03/2016 | 30 | 28.52 | 7.63 | 88.94 | 1.97 | 4.64 | - | - |
| SBN ST 6 | Matla middle surface | 29/03/2016 | 31 | 28.84 | 6.89 | 90.13 | 2.45 | 9.70 | - | - |
| SBN ST 7 | Matla middle bottom | 29/03/2017 | - | 29.17 | - | 96.07 | - | 4.55 | - | - |
| SBN ST 8 | Matla lower Kalas | 29/03/2018 | 31.5 | 29.82 | 7.1 | 65.42 | 3.28 | 4.57 | - | - |
| HGL U 1 | Budge Budge | 28/04/2016 | 33 | 0.82 | 4.84 | 515.46 | 8.24 | 6.74 | - | - |
| HGL U 2 | Burul | 28/04/2016 | 32.5 | 6.86 | 6.67 | 829.14 | 5.52 | - | - | - |
| HGL U 3 | Falta | 28/04/2016 | 32 | 8.24 | 6.42 | 487.59 | 5.04 | 6.74 | - | - |
| HGL U 4 | Diamond Harbour | 28/04/2016 | 33.1 | 8.58 | 6.27 | 723.56 | 6.13 | - | - | - |
| HGL U 5 | Nischindipur | 28/04/2016 | 32.7 | 14.07 | 6.17 | 516.75 | 5.45 | 6.27 | - | - |
| HGL M 1 | Lot-8 | 28/04/2016 | 32.9 | 21.28 | 5.87 | 610.83 | 6.33 | - | - | - |
| HGL M 2 | Kachuberia | 28/04/2016 | 32.7 | 26.77 | 6.16 | 576.89 | 5.93 | 4.72 | - | - |
| HGL M 3 | Krishnanagar | 29/04/2016 | 33.2 | 28.14 | 6.51 | 744.6 | 5.04 | 5.85 | - | - |
| HGL L 1 | Beguakhali | 29/04/2016 | 32.9 | 32.94 | 6.29 | 434.35 | 5.52 | - | - | - |
| HGL L 2 | Chemaguri | 29/04/2016 | 32.1 | 28.14 | 6.45 | 418.57 | 5.52 | 5.19 | - | - |
| HGL L 3 | Muriganga | 29/04/2016 | 32.4 | 28.83 | 6.53 | 558.53 | 5.46 | - | - | - |
| SBN ST 1 | Saptamukhi Upper | 07/06/2015 | 33 | 26.32 | 5.58 | 80.2 | 7.28 | 3.02 | - | - |
| SBN ST 2 | Pathar pratima | 07/06/2015 | 34 | 28.49 | 5.58 | 21.6 | 4.13 | 3.23 | - | - |
| SBN ST 3 | Saptamukhi middle Lothian | 07/06/2015 | 31.5 | 28.76 | 5.38 | 135.4 | 3.29 | 4.06 | - | - |
| SBN ST 4 | Saptamukhi lower 1 | 07/06/2015 | 32 | 29.58 | 5.78 | 62.2 | 8.25 | 3.58 | - | - |
| SBN ST 5 | Saptamukhi lower 2 | 07/06/2015 | 32 | 29.58 | 5.58 | 42.4 | 3.72 | 3.23 | - | - |
| SBN ST 6 | Thakuran upper surface | 08/06/2015 | 34 | 30.39 | 5.63 | 12.4 | 3.95 | 3.54 | - | - |
| SBN ST 7 | Thakuran upper bottom | 08/06/2015 | - | 30.39 | 5.65 | 12.1 | - | 4.02 | - | - |
| SBN ST 8 | Thakuran middle surface | 08/06/2015 | 33 | 30.39 | 5.62 | 22.8 | - | 3.66 | - | - |
| SBN ST 9 | Thakuran middle bottom | 08/06/2015 | 32 | 30.93 | 5.81 | 17 | - | 3.97 | - | - |
| SBN ST 10 | Dhanchi surface | 08/06/2015 | 32 | 29.03 | 5.58 | 23.1 | 4.39 | 2.98 | - | - |
| SBN ST 11 | Thakuran lower surface | 08/06/2015 | 32 | 30.39 | 5.69 | 10.5 | - | 3.39 | - | - |
| SBN ST 12 | Thakuran lower bottom | 08/06/2015 | 31 | 30.12 | 5.75 | 18.7 | - | 3.01 | - | - |
| SBN ST 13 | Matla upper 1 | 09/06/2015 | 32 | 30.12 | 3.13 | 11.8 | - | 3.41 | - | - |
| SBN ST 14 | Matla upper 2 | 09/06/2015 | 32 | 30.39 | 5.81 | 12.4 | 0.85 | 4.02 | - | - |
| SBN ST 15 | Matla middle 1 surface | 09/06/2015 | 30 | 30.12 | 5.5 | 9.9 | 3.93 | 3.01 | - | - |
| SBN ST 16 | Matla middle 1 bottom | 09/06/2015 | 31 | 30.39 | 5.75 | 21 | - | 3.26 | - | - |
| SBN ST 17 | Matla lower | 09/06/2015 | 34 | 31.84 | 6.25 | 10.3 | - | 3.34 | - | - |
| HGL 1 | Burul | 29/12/2014 | 28.5 | 1 | 5.5 | 385.32 | - | 2.79 | - | - |
| HGL 2 | Diamond Harbour | 29/12/2014 | 28 | 6 | 4.6 | 109.12 | - | 2.5 | - | - |
| HGL 3 | Kulpi | 29/12/2014 | 28.3 | 14 | 5.62 | 250 | - | 2.95 | - | - |
| HGL 4 | Chemaguri | 29/12/2014 | 29.1 | 24 | 7.1 | 75.5 | - | 3.39 | - | - |
| SBN ST 1 | Saptamukhi 1 | 30/12/2014 | 29 | 25 | 6.75 | 52.33 | - | 4.38 | - | - |
| SBN ST 2 | Saptamukhi 2 | 30/12/2014 | 28.3 | 25 | 6.5 | 45.77 | - | 3.43 | - | - |
| SBN ST 3 | Saptamukhi 3 | 30/12/2014 | 28.1 | 27 | 7 | 45.32 | - | 3.2 | - | - |
| SBN ST 4 | Saptamukhi 4 | 30/12/2014 | 27.5 | 27 | 7.22 | 49.48 | - | 3.01 | - | - |
| SBN ST 5 | Saptamukhi 5 | 31/12/2014 | 27.5 | 26.5 | 6.85 | 52.06 | - | 2.84 | - | - |
| SBN ST 6 | Saptamukhi 6 | 31/12/2014 | 27.4 | 25 | 6.48 | 54.63 | - | 3.08 | - | - |
| HGL 1 | Diamond Harbour 1 | 25/05/2014 | 32.5 | 1.5 | 6.65 | 223.1 | - | 3.17 | - | -25.1 |
| HGL 2 | Diamond Harbour 2 | 25/05/2014 | 33.3 | 2 | 6.3 | 59.8 | - | 2.72 | - | -25.3 |
| HGL 3 | Lot 8 | 25/05/2014 | 32.9 | 18.5 | 5.85 | 142 | - | 2.77 | - | -24.7 |
| HGL 4 | Kachuberia | 25/05/2014 | 32.1 | 18 | 6 | 96.5 | - | 3.21 | - | -24.3 |
| HGL 5 | Chemagari | 25/05/2014 | 33 | 25 | 6.75 | 52.3 | - | 4.38 | - | -23.8 |
| SBN ST 1 | Saptamukhi Upper | 26/05/2014 | 33.5 | 26 | 6.67 | 182 | - | 3.94 | - | -24.9 |
| SBN ST 2 | Saptamukhi Middle | 26/05/2014 | 33 | 30 | 6.87 | 157 | - | 3.12 | - | -23.9 |
| SBN ST 3 | Saptamukhi lower | 26/05/2014 | 32.1 | 31 | 6.44 | 112 | - | 3.53 | - | -24.4 |
| HGL 1 | Diamond Surface | 19/11/2013 | 25 | 4.98 | 5.57 | 72.17 | 2.94 | 2.82 | - | - |
| HGL 2 | Diamond Bottom | 19/11/2013 | 25 | 3.98 | 6.12 | 89.57 | - | 3.58 | - | - |
| HGL 3 | Lot 8 surface | 19/11/2013 | 26.5 | 6.97 | 5.88 | 127.54 | 3.23 | 2.47 | - | - |
| SBN ST 1 | Pathar pratima surface | 19/11/2013 | 28.2 | 20.9 | 5.67 | 80.58 | 2.87 | 3.09 | - | - |
| SBN ST 2 | Pathar pratima bottom | 19/11/2013 | 26 | 19.9 | 6.12 | 123.14 | - | 3.39 | - | - |
| SBN ST 3 | Rakkhaskhali surface | 19/11/2013 | 26 | 19.9 | 5.95 | 60.57 | 4.01 | 4.61 | - | - |
| SBN ST 4 | Rakkhaskhali bottom | 19/11/2013 | 25 | 20.9 | 5.07 | 106 | - | - | - | - |
| SBN ST 5 | Saptamukhi middle, Lothian | 19/11/2013 | 25 | 16.92 | 5.12 | 58.29 | 3.15 | 4.7 | - | - |
| SBN ST 6 | Saptamukhi lower surface | 19/11/2013 | 25 | 20.1 | 5 | 87.54 | - | 8.56 | - | - |
| SBN ST 7 | Saptamukhi lower bottom | 19/11/2013 | 25 | 20.5 | 4.24 | 114.49 | - | - | - | - |
| SBN ST 8 | Gangar ghat surface | 20/11/2013 | 25 | 19.9 | 6.07 | 75.36 | - | 5.99 | - | - |
| SBN ST 9 | Gangar ghat bottom | 20/11/2013 | 25 | 18.91 | 4.41 | 110.72 | - | 2.11 | - | - |
| SBN ST 10 | Thakuran upper surface | 20/11/2013 | 26 | 21.89 | 5.51 | 81.43 | 3.23 | - | - | - |
| SBN ST 11 | Thakuran upper bottom | 20/11/2013 | 26 | 19.9 | 3.23 | 313.28 | - | - | - | - |
| SBN ST 12 | Thakuran middle surface | 20/11/2013 | 25 | 21.89 | 6.63 | 150.29 | 3.56 | - | - | - |
| SBN ST 13 | Thakuran middle bottom | 20/11/2013 | 25.5 | 21.89 | 6.29 | 97.1 | - | 7.94 | - | - |
| SBN ST 14 | Dhanchi Surface | 20/11/2013 | 26 | 20.9 | 3.93 | 53.33 | 3.78 | 3.96 | - | - |
| SBN ST 15 | Dhanchi Bottom | 20/11/2013 | 25 | 19.9 | 4.19 | 112.57 | - | 5.7 | - | - |
| SBN ST 16 | Thakuran lower surface | 20/11/2013 | 26 | 23.88 | 6.33 | 74 | - | - | - | -- |
| SBN ST 17 | Thakuran lower bottom | 20/11/2013 | 25.5 | 22.89 | 6.17 | 75.43 | - | - | - | - |
| SBN ST 18 | Bony camp | 21/11/2013 | 25.5 | 17.91 | 5.1 | 114.31 | - | 4.45 | - | - |
| SBN ST 19 | Matla upper surface | 21/11/2013 | 25 | 19.9 | 4.31 | 92.53 | 4.57 | 8.2 | - | - |
| SBN ST 20 | Matla upper bottom | 21/11/2013 | 25.5 | 18.91 | 3.55 | 227.06 | - | 2.35 | - | - |
| SBN ST 21 | Matla middle surface | 21/11/2013 | 25 | 20.9 | 5.71 | 71.01 | 3.71 | 3.34 | - | - |
| SBN ST 22 | Matla middle bottom | 21/11/2013 | 26 | 19.9 | 5.05 | 128.41 | - | 2.56 | - | - |
| SBN ST 23 | Matla lower surface | 21/11/2013 | 26 | 20.9 | 4.29 | 97.88 | 3.91 | 3.01 | - | - |
| SBN ST 24 | Matla lower bottom | 21/11/2013 | 25.5 | 21.89 | 5.44 | 150.18 | - | 8.27 | - | - |
| SBN ST 25 | Kalas camp | 21/11/2013 | 25 | 22.89 | 4.99 | 118.86 | - | 3.35 | - | - |
| SBN ST 1 | Pathar pratima surface | 24/03/2013 | 32 | 27.86 | 5.17 | **-** | 1.27 | 2.66 | - | - |
| SBN ST 2 | Pathar pratima bottom | 24/03/2013 | 32 | 28.86 | 6.17 | 30.80 | 3.24 | 1.72 | - | - |
| SBN ST 3 | Rakkhaskhali | 24/03/2013 | 29 | 26.87 | 5.55 | 24.30 | 1.84 | 1.72 | - | - |
| SBN ST 4 | Saptamukhi middle lothian | 24/03/2013 | 29 | 25.87 | 4.94 | **-** | **-** | 2.87 | - | - |
| SBN ST 5 | Thakuran Middle surface | 25/03/2013 | 29 | 27.86 | 5.80 | 19.90 | 1.48 | 1.92 | - | - |
| SBN ST 6 | Thakuran Middle bottom | 25/03/2013 | 28 | 22.89 | 4.09 | **-** | **-** | 2.15 | - | - |
| SBN ST 7 | Thakuran Mouth surface | 25/03/2013 | 31 | 26.87 | 4.83 | 66.10 | **-** | 2.33 | - | - |
| SBN ST 8 | Thakuran mouth bottom | 25/03/2013 | 29 | 26.87 | 4.09 | 69.30 | **-** | 6.86 | - | - |
| SBN ST 9 | Matla upper surface | 26/03/2013 | 27 | 25.87 | 5.80 | 129.50 | 6.16 | 1.85 | - | - |
| SBN ST 10 | Matla upper bottom | 26/03/2013 | 28 | 27.86 | 4.83 | 159.60 | **-** | 2.97 | - | - |
| SBN ST 11 | Matla middle surface | 26/03/2013 | 28 | 27.86 | 5.25 | **-** | 1.77 | 1.72 | - | - |
| SBN ST 12 | Matla lower surface | 26/03/2013 | 29 | 27.86 | 4.42 | 88.50 | 1.92 | 2.18 | - | - |
| SBN ST 13 | Matla lower bottom | 26/03/2013 | 29 | 27.86 | 5.72 | 144.30 | **-** | 1.62 | - | - |
| HGL 1 | Diamond Surface | 3/10/2012 | 30 | 0.5 | 5.82 | 270.9 | 1.29 | 2.73 | - | - |
| HGL 2 | Diamond Bottom | 3/10/2012 | 30 | 0.5 | 5.98 | 363.2 | **-** | 3.26 | - | - |
| HGL 3 | Lot 8 | 3/10/2012 | 29.8 | 2.99 | 6.54 | 285.6 | 3.14 | 2.25 | - | - |
| SBN ST 1 | Pathar pratima surface | 4/10/2012 | 32 | 17.91 | 4.14 | 90.5 | - | - | - | - |
| SBN ST 2 | Pathar pratima bottom | 4/10/2012 | 31.2 | 18.91 | 4.19 | 110.5 | **-** | - | - | - |
| SBN ST 3 | Saptamukhi upper surface | 4/10/2012 | 30 | 16.92 | 4.2 | 80.2 | **-** | 4.52 | - | - |
| SBN ST 4 | Saptamukhi upper lower | 4/10/2012 | 31 | 16.92 | 3.95 | 281.2 | **-** | 5.27 | - | - |
| SBN ST 5 | Saptamukhi middle, Lothian surface | 4/10/2012 | 30 | 18.91 | 5.5 | 97.3 | - | - | - | - |
| SBN ST 6 | Saptamukhi middle, Lothian bottom | 4/10/2012 | 31 | 19.9 | 4.27 | 189.6 | **-** | - | - | - |
| SBN ST 7 | Saptamukhi lower | 4/10/2012 | 29.5 | 19.9 | 4.09 | 130.5 | 3.57 | - | - | - |
| SBN ST 8 | Dhanchi surface | 5/10/2012 | 29 | 16.92 | 5.72 | 147.5 | - | - | - | - |
| SBN ST 9 | Dhanchi bottom | 5/10/2012 | 32 | 18.41 | 4.65 | 136 | **-** | - | - | - |
| SBN ST 10 | Thakuran upper surface | 5/10/2012 | 31 | 17.91 | 4.02 | 37.45 | 2.79 | - | - | - |
| SBN ST 11 | Thakuran upper bottom | 5/10/2012 | 31 | 18.91 | 4.6 | 183.1 | **-** | - | - | - |
| SBN ST 12 | Thakuran middle surface | 5/10/2012 | 32 | 18.91 | 5.42 | 52.1 | 2.84 | - | - | - |
| SBN ST 13 | Thakuran middle bottom | 5/10/2012 | 31 | 18.91 | 5.51 | 162 | **-** | - | - | - |
| SBN ST 14 | Thakuran lower surface | 5/10/2012 | 31 | 19.9 | 5.14 | 113.1 | 1.97 | - | - | - |
| SBN ST 15 | Thakuran lower bottom | 5/10/2012 | 31 | 18.91 | 3.78 | 246.79 | **-** | - | - | - |
| HGL 1 | Diamond Harbour | 15/07/2012 | 26 | 1 | 5.53 | **-** | **-** | **-** | - | - |
| HGL 2 | Kulpi | 15/07/2012 | 32 | 1 | 5.53 | **-** | **-** | **-** | - | - |
| SBN ST 1 | Pathar pratima Surface | 15/07/2012 | 32 | 27 | 5.12 | **-** | **-** | 1.86 | - | - |
| SBN ST 2 | Pathar pratima Bottom | 15/07/2012 | **-** | 27 | 5.17 | **-** | **-** | **-** | - | - |
| SBN ST 3 | Ramganga surface | 15/07/2012 | 31 | 28 | 5.5 | **-** | **-** | 1.97 | - | - |
| SBN ST 4 | Ramganga bottom | 15/07/2012 | 31.2 | 27 | 5.32 | **-** | **-** | 1.54 | - | - |
| SBN ST 5 | Saptamukhi middle,Lothian surface | 16/07/2012 | **-** | 26 | 5.3 | **-** | **-** | 5.22 | - | - |
| SBN ST 6 | Saptamukhi middle,Lothian bottom | 16/07/2012 | **-** | 26 | 5.41 | **-** | **-** | **-** | - | - |
| SBN ST 7 | Saptamukhi lower surface | 16/07/2012 | 30.5 | 28 | 5.83 | **-** | **-** | 4.35 | - | - |
| SBN ST 8 | Saptamukhi lower bottom | 16/07/2012 | 31 | 28 | 5.67 | **-** | **-** | **-** | - | - |
| SBN ST 9 | Thakuran upper surface | 17/07/2012 | **-** | 27 | 5.35 | **-** | **-** | 1.16 | - | - |
| SBN ST 10 | Thakuran upper bottom | 17/07/2012 | **-** | 27.5 | 5.3 | **-** | **-** | - | - | - |
| SBN ST 11 | Dhanchi surface | 17/07/2012 | 32 | 28 | 4.96 | **-** | **-** | 1.37 | - | - |
| SBN ST 12 | Dhanchi bottom | 17/07/2012 | 32 | 28 | 5.21 | **-** | **-** | - | - | - |
| SBN ST 13 | Thakuran middle surface | 17/07/2012 | 32 | 28 | 5.39 | **-** | **-** | **-** | - | - |
| SBN ST 14 | Thakuran middle bottom | 17/07/2012 | **-** | 28 | 5.27 | **-** | **-** | 2.16 | - | - |
| SBN ST 15 | Thakuran lower surface | 17/07/2012 | 32 | 28 | 5.63 | **-** | **-** | - | - | - |
| SBN ST 16 | Thakuran lower bottom | 17/07/2012 | **-** | 27 | 5.27 | **-** | **-** | 2.51 | - | - |

-
